# Supplementary material for: Inequalities in Alcohol-Related Mortality in 17 European Countries: A Retrospective Analysis of Mortality Registers
Source: PLoS Med. 2015 Dec 1;12(12):e1001909. doi: 10.1371/journal.pmed.1001909 (PMC4666661; doi:10.1371/journal.pmed.1001909)
Supplement: S1 Table — For the time periods to which these data apply, see Table 2. Percentage population by education level was calculated among those with known education level. (XLSX) [file pmed.1001909.s004.xlsx]

## Sheet: S1_Table
S1 Table. Data sources: quantitative characteristics for latest observed period among men, by education
		Men (Education, 35-79 years)
	Country	Total person-years	Missing education (%)	Low educated (%)	Mid educated (%)	High educated (%)	Deaths from alcohol-related causes
North	Finland	6.55705e+06	0	0.339369	0.381452	0.279179	7001
	Sweden	9.0795e+06	0.0114207	0.285359	0.452724	0.261917	2436
	Norway	2.46973e+06	0.0208122	0.249879	0.49379	0.25633	699
	Denmark	6.49587e+06	0	0.365056	0.418418	0.216526	4851
West	Scotland (UK)	289330	0	0.565329	0.212253	0.222418	128.52
	England & Wales (UK)	495284	0.111392	0.534745	0.23495	0.230305	93
	Belgium	5250670	0.0237307	0.51981	0.237532	0.242659	1452
	France	461084	0	0.350337	0.466292	0.18337	186
	Switzerland	4144956	0.0422861	0.137228	0.535826	0.326946	1131
	Austria	2037796	0	0.216796	0.687149	0.0960556	403
South	Barcelona (Spain)	1655103	0	0.483658	0.264576	0.251766	128
	Basque Country (Spain)	2.84217e+06	0	0.591393	0.227603	0.181004	229
	Madrid (Spain)	2.10504e+06	0.0169779	0.570655	0.21351	0.215835	105
	Turin (Italy)	847800	3.66006e-05	0.545136	0.303212	0.151652	38
East	Slovenia	2238797	0	0.284551	0.55795	0.157499	2820
	Hungary	9546032	0	0.651776	0.205419	0.142805	18978
	Czech Republic	14643606	0	0.627099	0.238392	0.134509	4982
	Poland	21370641	0.0226362	0.594534	0.29149	0.113976	7917
	Lithuania	2.59008e+06	0.00830816	0.174598	0.650538	0.174865	2759
	Estonia	1518780	0.0238481	0.323879	0.503376	0.172745	2139
Note: For time-periods to which these data apply, see table 2. Percentage population by education or occupational class calculated among those with known education and occupational class, respectively.
