# Supplementary material for: Inequalities in Alcohol-Related Mortality in 17 European Countries: A Retrospective Analysis of Mortality Registers
Source: PLoS Med. 2015 Dec 1;12(12):e1001909. doi: 10.1371/journal.pmed.1001909 (PMC4666661; doi:10.1371/journal.pmed.1001909)
Supplement: S2 Table — For the time periods to which these data apply, see Table 2. Percentage population by occupational class was calculated among those with known occupational class. (XLSX) [file pmed.1001909.s005.xlsx]

## Sheet: S2_Table
S2 Table. Data sources: quantitative characteristics for latest observed period among men, by occupational class
		Men (occupation; 35-64 years)
		Total person-years	Missing occupation (%)	Manual occupation (%)	Non-manual occupation (%)	Farmers and self-employed (%)	Deaths from alcohol-related causes
North	Finland	5.10854e+06	0.0348774	0.462995	0.385277	0.151728	5764
	Sweden	7.86544e+06	0.148887	0.440318	0.466342	0.0933407	2020
	Denmark	5.33784e+06	0.163492	0.552643	0.308456	0.138901	4020
West	England & Wales	379135	0.0356445	0.379771	0.469501	0.150728	75
	France	376841	0.056	0.334	0.482	0.128	151
	Switzerland	3.19099e+06	0.208253	0.143825	0.673187	0.182988	641
	Austria	1.64594e+06	0.194192	0.374841	0.483279	0.14188	300
South	Basque Country	2.18616e+06	0.0269561	0.595673	0.377696	0.0266304	166
	Madrid	1.67936e+06	0.188196	0.381805	0.608323	0.00987212	76
	Turin	580480	0.0759747	0.380633	0.447485	0.171882	22
East	Lithuania	2.33213e+06	0.355207	0.48058	0.293371	0.226049	2538
	Estonia	1224675	0.35391	0.564329	0.397453	0.038218	1160
Note: For time-periods to which these data apply, see table 2. Percentage population by education or occupational class calculated among those with known education and occupational class, respectively.
