# Supplementary material for: Inequalities in Alcohol-Related Mortality in 17 European Countries: A Retrospective Analysis of Mortality Registers
Source: PLoS Med. 2015 Dec 1;12(12):e1001909. doi: 10.1371/journal.pmed.1001909 (PMC4666661; doi:10.1371/journal.pmed.1001909)
Supplement: S3 Table — For the time periods to which these data apply, see Table 2. Percentage population by education level was calculated among those with known education level. (XLSX) [file pmed.1001909.s006.xlsx]

## Sheet: S3_Table
S3 Table. Data sources: quantitative characteristics for latest observed period among women, by education
		Women (Education; 35-79 years)
	Country	Total person-years	Missing education (%)	Low educated (%)	Mid educated (%)	High educated (%)	Deaths from alcohol-related causes
North	Finland	6.89031e+06	0	0.331763	0.354098	0.31414	1950
	Sweden	9.15939e+06	0.0114188	0.264631	0.450254	0.285114	710
	Norway	2.50726e+06	0.0142031	0.302267	0.460184	0.237548	253
	Denmark	6.75191e+06	0	0.453579	0.320149	0.226272	1728
West	Scotland (UK)	318447	0	0.613985	0.173845	0.21217	53.2125
	England & Wales (UK)	529241	0.0587934	0.554527	0.243209	0.202264	55
	Belgium	5560886	0.0168763	0.558404	0.22222	0.219376	644
	France	510063	0	0.454738	0.368843	0.176419	58
	Switzerland	4588930	0.0549525	0.294314	0.57658	0.129107	519
	Austria	2.21042e+06	0	0.4277	0.499029	0.0732713	102
South	Barcelona (Spain)	1882551	0	0.554126	0.214913	0.230962	44
	Basque Country (Spain)	3.02058e+06	0	0.687119	0.153767	0.159114	54
	Madrid (Spain)	2.40141e+06	0.0169891	0.666414	0.172799	0.160787	21
	Turin (Italy)	974983	1.4349e-05	0.610685	0.2612	0.128114	9
East	Slovenia	2523941	0	0.436441	0.421393	0.142166	913
	Hungary	11485316	0	0.635893	0.255755	0.108352	5892
	Czech Republic	16340922	0	0.64534	0.278185	0.0764744	1461
	Poland	22533243	0.0195188	0.467075	0.407984	0.12494	1038
	Lithuania	3.06602e+06	0.00536092	0.133723	0.653595	0.212681	1078
	Estonia	1997440	0.0224012	0.292565	0.53027	0.177165	774
Note: For time-periods to which these data apply, see table 2. Percentage population by education or occupational class calculated among those with known education and occupational class, respectively.
