# Supplementary material for: Inequalities in Alcohol-Related Mortality in 17 European Countries: A Retrospective Analysis of Mortality Registers
Source: PLoS Med. 2015 Dec 1;12(12):e1001909. doi: 10.1371/journal.pmed.1001909 (PMC4666661; doi:10.1371/journal.pmed.1001909)
Supplement: S4 Table — (XLSX) [file pmed.1001909.s007.xlsx]

## Sheet: S4_Table
S4 Table. ICD-code numbers
	Revisions of International Classification of Diseases
Cause of death	ICD-8	ICD-9	ICD-10
Alcoholic psychosis, dependence and abuse	291, 303	291, 303, 305.0	F10
Alcoholic cardiomyopathy	425	425.5	I42.6
Alcoholic cirrhosis of liver	571.0	571.0–571.3	K70
Accidental poisoning by alcohol	E860	E860	X45
