# Supplementary material for: Inequalities in Alcohol-Related Mortality in 17 European Countries: A Retrospective Analysis of Mortality Registers
Source: PLoS Med. 2015 Dec 1;12(12):e1001909. doi: 10.1371/journal.pmed.1001909 (PMC4666661; doi:10.1371/journal.pmed.1001909)
Supplement: S5 Table — RD, rate difference; RR, rate ratio. (XLSX) [file pmed.1001909.s008.xlsx]

## Sheet: S5_Table
S5_Table. Occupational class inequalities in mortality from alcohol-related causes, latest observed period, by country, men 35-64 years (Rate Ratio and Rate Difference, age-adjusted, with 95% Confidence Intervals)
		Men
Country	Period	RR	95% CI		RD	95% CI		% of RD in total mortality
Finland	2006–2010	2.5435	2.3862	2.7269	87.85	82.38	94.05	0.237317
Sweden	1995-1999	2.9863	2.6223	3.3732	17.68	15.55	19.71	0.075196
Denmark	2001–2005	2.0415	1.7766	2.4069	19.04	15.55	22.48	0.122263
England & Wales	2006–2009	2.4064	1.4521	4.5245	16.33	6.57	26.94	0.0880276
France	2004–2007	2.29211	1.60772	3.40948	32.6	17.61	48.81	0.132359
Switzerland	2006–2008	2.7305	2.0285	3.5994	13.68	9.03	18.4	0.0721139
Austria	2001–2002	3.138	2.0995	5.0739	14.01	8.14	20.9	0.111607
Basque Country	2001-2006	1.8353	1.2696	2.8676	4.1	1.69	6.58	0.0326641
Madrid	2001–2003	0.9474	0.3922	1.8757	-0.14	-2	1.68	-0.00244627
Turin	2006–2010	3.2151	0.9871	16.7483	3.18	-0.03	6.94	0.0236907
Lithuania	2006–2009	2.2271	1.8568	2.7757	33.75	26.48	41.49	0.0772276
Estonia	1998–2002	1.758	1.3119	2.5671	14.07	7.03	21.56	0.0619006
Notes: RR = Rate Ratio. RD = Rate Difference
