# Supplementary material for: Inequalities in Alcohol-Related Mortality in 17 European Countries: A Retrospective Analysis of Mortality Registers
Source: PLoS Med. 2015 Dec 1;12(12):e1001909. doi: 10.1371/journal.pmed.1001909 (PMC4666661; doi:10.1371/journal.pmed.1001909)
Supplement: S6 Table — For Basque Country and Estonia, no data on occupational class inequality in mortality from alcohol-related causes were available for periods earlier than those presented in S5 Table. (XLSX) [file pmed.1001909.s009.xlsx]

## Sheet: S6_Table
S6 Table. Trends in relative occupational class inequalities in mortality from alcohol-related causes, by country, men 35-64 years (Rate ratio with 95% Confidence Intervals)
		Rate ratio
		% CI
		1980-4		1985-9		1990-4		1995-9		2000-4		2005-9
North	Finland	1.9587		1.9177		2.1517		2.4977		2.3031		2.5435
		1.7582	2.2074	1.746	2.1079	1.9821	2.35	2.2962	2.7079	2.1494	2.4691	2.3862	2.7269
	Sweden					2.7188		2.9863
						2.2946	3.264	2.6223	3.3732
	Denmark					1.6214		1.9726		2.0415
						1.4181	1.857	1.6998	2.2941	1.7766	2.4069
West	England & Wales	1.4069		1.0461		1.013		1.7363		1.953		2.4064
		0.5933	4.7595	0.4845	2.6173	0.5323	1.9576	1.1083	2.9703	1.277	3.2181	1.4521	4.5245
	France	2.48166		3.42897		3.86911		3.62582		2.76953		2.29211
		1.567	4.56316	2.26014	5.86072	2.55951	5.76701	2.30627	5.91716	1.95236	4.00641	1.60772	3.40948
	Switzerland					2.5936		2.5005		3.0455		2.7305
						2.2019	3.03	2.1743	2.8672	2.4284	3.8262	2.0285	3.5994
	Austria					3.5639		2.7694		3.138
						1.7083	6.8397	1.6099	5.0676	2.0995	5.0739
South	Spain (Madrid)							2.5248		0.9474
								1.5861	4.2873	0.3922	1.8757
	Italy (Turin)	3.427		1.6315		2.9349		3.005		1.8982		3.2151
		1.389	23.8754	0.8277	4.0378	1.2502	11.5703	1.2312	9.9613	0.8858	4.4979	0.9871	16.7483
East	Lithuania									1.9379		2.2271
										1.5347	2.524	1.8568	2.7757
Note: For Basque Country and Estonia, no data on occupational class inequalities in mortality from alcohol-related causes were available for earlier periods than those presented in web appendix table A2.
