# Supplementary material for: Inequalities in Alcohol-Related Mortality in 17 European Countries: A Retrospective Analysis of Mortality Registers
Source: PLoS Med. 2015 Dec 1;12(12):e1001909. doi: 10.1371/journal.pmed.1001909 (PMC4666661; doi:10.1371/journal.pmed.1001909)
Supplement: S7 Table — For Basque Country and Estonia, no data on occupational class inequality in mortality from alcohol-related causes were available for periods earlier than those presented in S5 Table. (XLSX) [file pmed.1001909.s010.xlsx]

## Sheet: S7_Table
S7 Table. Trends in absolute occupational class inequalities in mortality from alcohol-related causes, by country, men 35-64 years (Rate difference with 95% Confidence Intervals)
		Rate difference
		% CI
		1980-4		1985-9		1990-4		1995-9		2000-4		2005-9
North	Finland	32.72		41.87		50.04		70.39		67.57		87.85
		28.01	37.62	36.19	47.55	45.11	55.09	64.14	76.12	62.2	72.76	82.38	94.05
	Sweden					13.6		17.68
						11.32	16.01	15.55	19.71
	Denmark					14.08		18.83		19.04
						10.41	17.73	14.86	22.66	15.55	22.48
West	England & Wales	1.58		0.28		0.11		8.67		12.27		16.33
		-2.46	5.7	-4.35	5.27	-5.45	5.36	1.62	16.21	4.08	20.9	6.57	26.94
	France	45.305		57.39		46.91		43.93		36.47		32.6
		22.34	69.315	37.27	78.265	31.37	61.68	27.66	60.1	23.14	52	17.61	48.81
	Switzerland					20.9		27.12		13.83		13.68
						16.63	25.23	22.07	32.18	9.97	17.65	9.03	18.4
	Austria					11.08		14.67		14.01
						4.13	18.83	6	23.61	8.14	20.9
South	Spain (Madrid)							4.54		-0.14
								2.2	7.06	-2	1.68
	Italy (Turin)	4.08		2.56		3.52		4.69		2.97		3.18
		1.18	7.16	-0.96	6.35	0.72	6.42	0.82	8.2	-0.54	6.3	-0.03	6.94
East	Lithuania									16.2		33.75
										10.6	21.81	26.48	41.49
Note: For Basque Country and Estonia, no data on occupational class inequalities in mortality from alcohol-related causes were available for earlier periods than those presented in web appendix table A2.
